# Supplementary material
Source: PubMed Central journal article supplement (PMC9343644)
Supplement: 41422_2022_655_MOESM1_ESM.pdf [file 41422_2022_655_MOESM1_ESM.pdf]

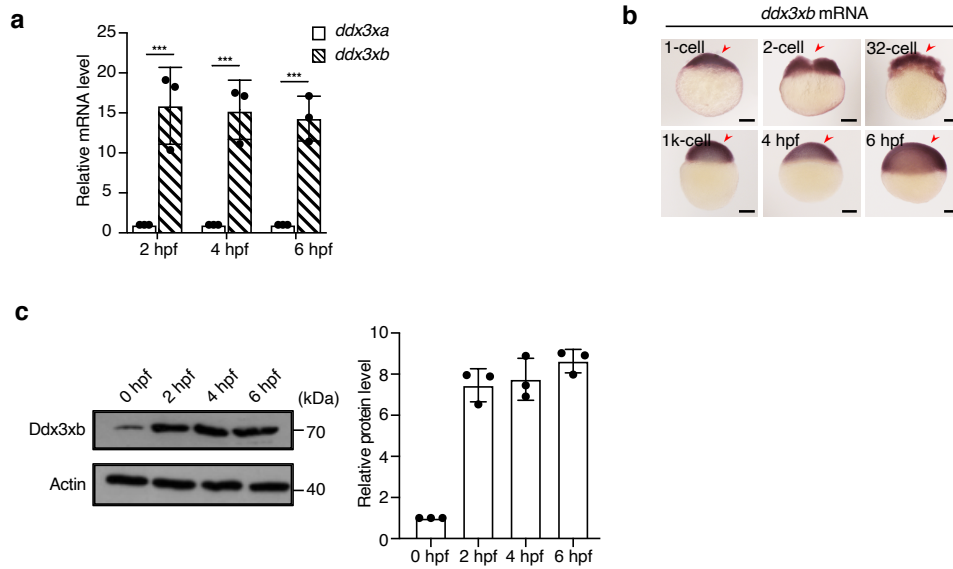

**Supplementary information, Fig. S1 Ddx3xb expression pattern during early zebrafish development.** **a**, Relative mRNA expression level of *ddx3xa* and *ddx3xb* in zebrafish.  $n = 3$  biological replicates, error bars, mean  $\pm$  SD,  $P$  values were calculated by the two-tailed Student's  $t$ -test, \*\*\*,  $P < 0.001$ . **b**, Whole-mount *in situ* hybridization (WISH) shows *ddx3xb* mRNA expression pattern in different developmental stages. Scale bars, 100  $\mu$ m. **c**, Western blot (left) and statistical (right) analyses show protein level of Ddx3xb at 0 hpf, 2 hpf, 4 hpf and 6 hpf.  $n = 3$  biological replicates, error bars, mean  $\pm$  SD.
