# Supplementary material
Source: PubMed Central journal article supplement (PMC9343644)
Supplement: 41422_2022_655_MOESM2_ESM.pdf [file 41422_2022_655_MOESM2_ESM.pdf]

**a**

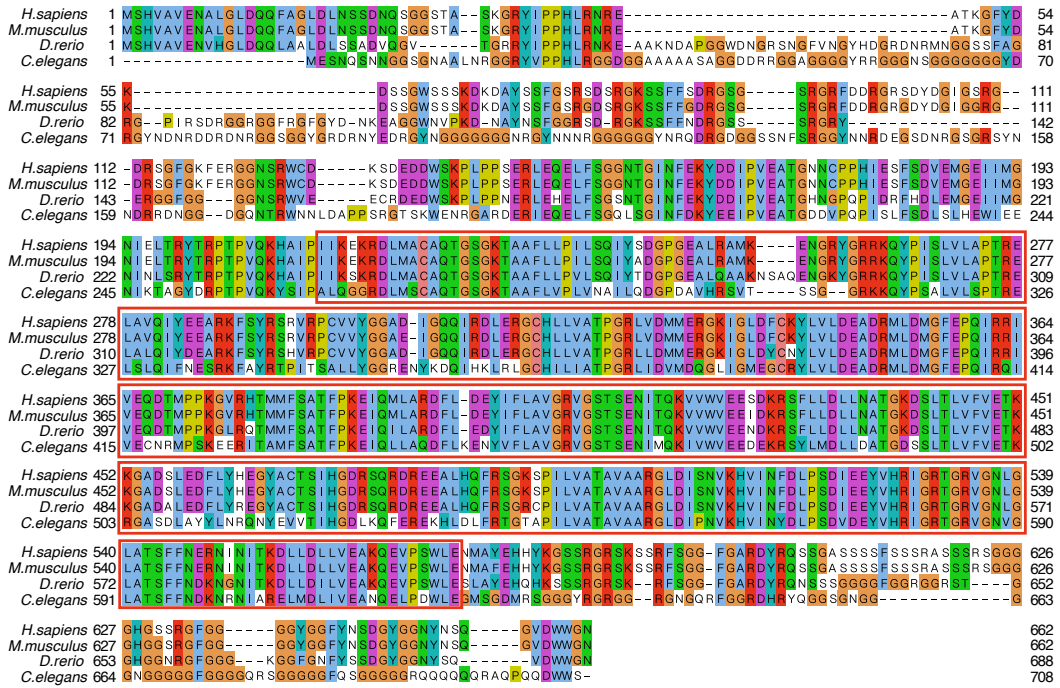

The conserved helicase domain is highlighted in the red boxes.

**b**

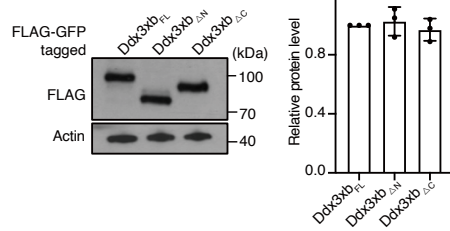

**c**

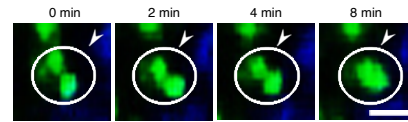

**d**

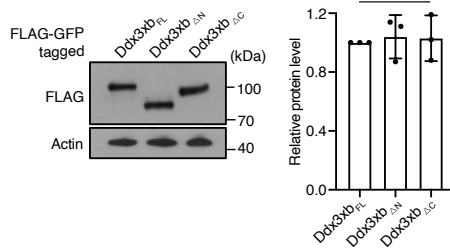

**Supplementary information, Fig. S2 N-terminal IDR drives zebrafish Ddx3xb phase separation. a,** Multi-alignment of protein sequences between human, mouse, zebrafish and *C. elegans*. **b,** Western blot (left) and statistical (right) analyses show protein level of different truncated versions of FLAG-GFP-tagged Ddx3xb in HEK293 cells. n = 3 biological replicates, error bars, mean  $\pm$  SD, *P* values were calculated by

the two-tailed Student' s *t*-test. **c**, Fusion upon contact of droplets formed by GFP-Ddx3xb protein in HEK293 cells. Scale bars, 2  $\mu\text{m}$ . **d**, Western blot (left) and statistical (right) analyses show protein level of different truncated versions of FLAG-GFP-tagged Ddx3xb in zebrafish embryos.  $n = 3$  biological replicates, error bars, mean  $\pm$  SD, *P* values were calculated by the two-tailed Student' s *t*-test.
