# Supplementary material
Source: PubMed Central journal article supplement (PMC9343644)
Supplement: 41422_2022_655_MOESM3_ESM.pdf [file 41422_2022_655_MOESM3_ESM.pdf]

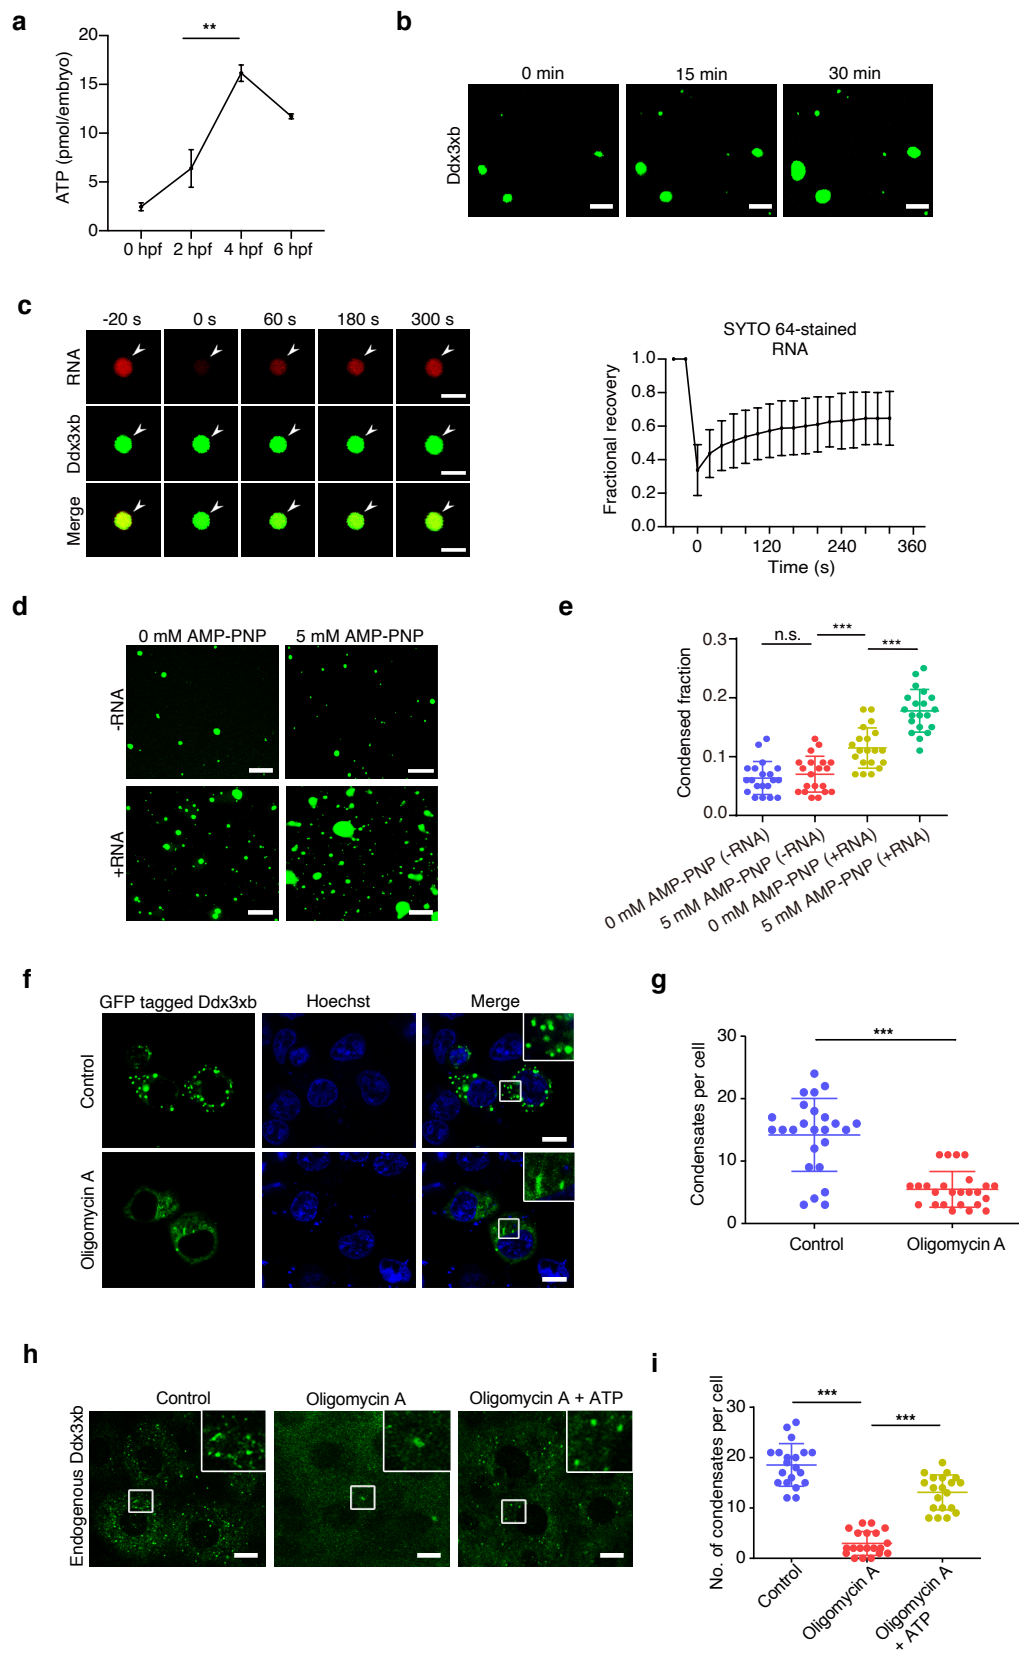

**Supplementary information, Fig. S3 ATP and RNA positively contributes to phase separation of zebrafish Ddx3xb.** **a**, Total ATP levels (in picomoles/embryo) during zebrafish embryogenesis.  $n = 3$  biological replicates per stage. Error bars, mean  $\pm$  SD.  $P$  values were determined by the two-tailed Student's  $t$  test, \*\*,  $P < 0.01$ . **b**, A time-course assay monitoring the droplets formation of Alexa-488 labeled Ddx3xb. Scale bars, 10  $\mu\text{m}$ . **c**, The SYTO 64-stained RNA in droplets were associated with fluorescence recovery. Left, representative images of fluorescence recovery. Scale bars, 2  $\mu\text{m}$ . Right, changes in the fluorescence intensity of SYTO 64-stained RNA droplets after photobleaching were plotted over time. The black curve represents the mean of the fluorescence intensity of photobleached regions in different droplets ( $n=5$ ). Error bars, mean  $\pm$  SD. **d**, phase separation analysis of Ddx3xb in response to AMP-PNP in the presence of RNA or not. Scale bars, 10  $\mu\text{m}$ . **e**, Quantification of the phase separation analysis as shown in (**d**).  $n = 20$  fields per condition. Error bars, mean  $\pm$  SD.  $P$  values were determined by the two-tailed Student's  $t$  test, \*\*\*,  $P < 0.001$ . **f**, Phase separation behavior of full-length Ddx3xb in different conditions. HEK293 cells in Oligomycin A treatment group were treated with 5  $\mu\text{M}$  Oligomycin A at 12 hours post plasmid transfection. **g**, Quantification of the number of droplets per cell from assay shown in (**f**).  $n = 25$  cells per condition. Error bars, mean  $\pm$  SD,  $P$  values were calculated by the two-tailed Student's  $t$ -test, \*\*\*,  $P < 0.001$ . **h**, Immunofluorescence staining showing the expression pattern of endogenous Ddx3xb in control, Oligomycin A treatment, and Oligomycin A treatment combined with ATP injection groups. Scale bars, 10  $\mu\text{m}$ . **i**, Quantification of the number of droplets per cell in images from assay shown in (**h**).  $n = 20$  cells per condition. Error bars, mean  $\pm$  SD.  $P$  values were determined by the two-tailed Student's  $t$  test, \*\*\*,  $P < 0.001$ .
