# Supplementary material
Source: PubMed Central journal article supplement (PMC9343644)
Supplement: 41422_2022_655_MOESM5_ESM.pdf [file 41422_2022_655_MOESM5_ESM.pdf]

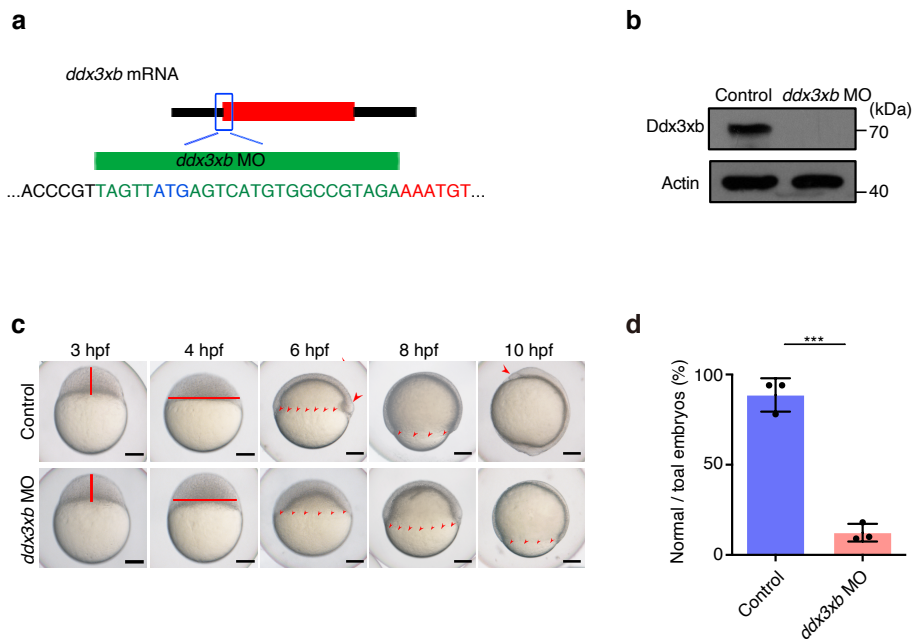

**Supplementary information, Fig. S5 Developmental delay induced by Ddx3xb knockdown.** **a**, Schematic diagram of *ddx3xb* morpholino (MO) binding site. **b**, Western blot demonstrating the absence of Ddx3xb protein upon *ddx3xb* MO treatment at 4 hpf. **c,d**, Time-matched images (**c**) and statistics (**d**) of zebrafish embryogenesis showing a developmental delay after 3 hpf in control and *ddx3xb* morphants. The red straight lines denote the height (3 hpf) and width (4 hpf) of blastula. The continuous small red arrowheads denote the edge of epiboly. The big red arrowheads denote the embryonic shield (6 hpf) and polster (10 hpf). Scale bars, 100  $\mu$ m.  $n = 3$  biological replicates, error bars, mean  $\pm$  SD,  $P$  values were calculated by the two-tailed Student's  $t$ -test, \*\*\*,  $P < 0.001$ .
