# Supplementary material
Source: PubMed Central journal article supplement (PMC9343644)
Supplement: 41422_2022_655_MOESM9_ESM.pdf [file 41422_2022_655_MOESM9_ESM.pdf]

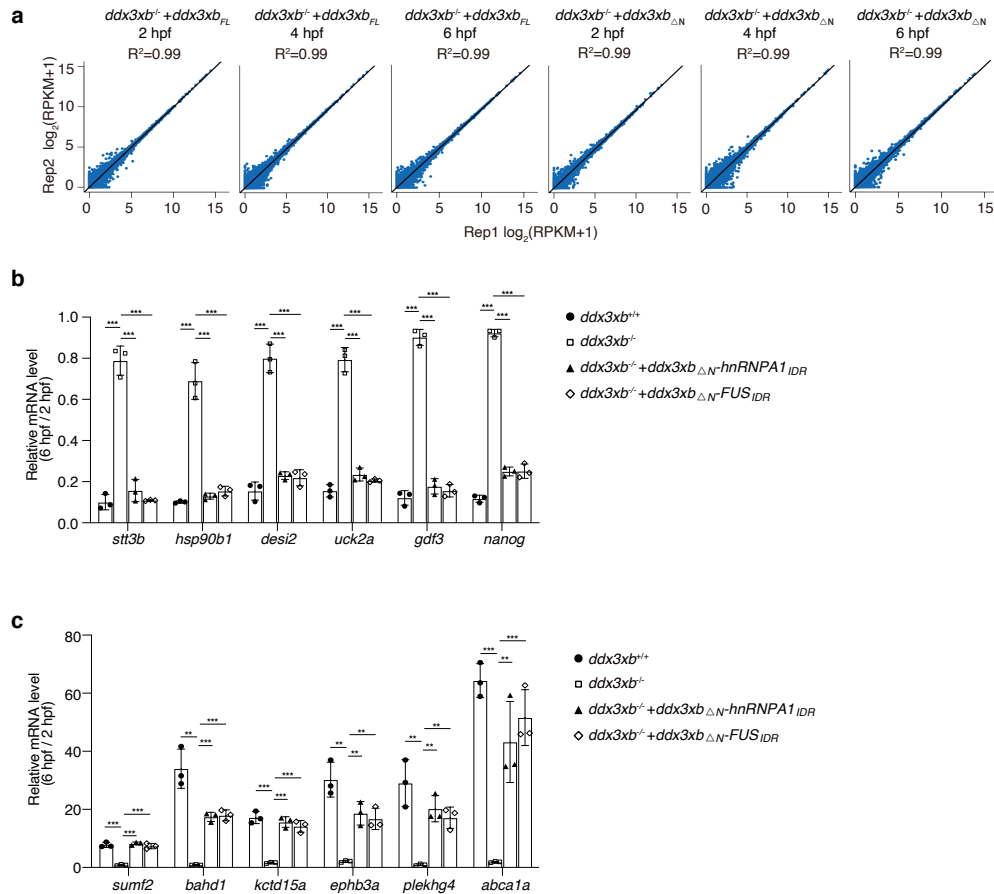

**Supplementary information, Fig. S9 The chimeric proteins containing IDRs from other RBPs can also fulfill the biological function of Ddx3xb during the MZT.**

**a**, RPKM correlation of RNA-seq data between biological replicates for *ddx3xb<sub>FL</sub>* and *ddx3xb<sub>ΔN</sub>* mRNAs injected *ddx3xb* mutant embryos at 2 hpf, 4 hpf and 6 hpf. **b**, qPCR analyses demonstrating that the relative expression of maternal decay genes in the *ddx3xb* wild-type, *ddx3xb* mutant, *ddx3xb<sub>ΔN</sub>-hnRNPA1<sub>IDR</sub>* or *ddx3xb<sub>ΔN</sub>-FUS<sub>IDR</sub>* mRNA injected *ddx3xb* mutant embryos between 2 hpf and 6 hpf. Error bars, mean  $\pm$  SD,  $n = 3$  biological replicates.  $P$  values were calculated by the two-tailed Student's  $t$ -test, \*\*,  $P < 0.01$ , \*\*\*,  $P < 0.001$ . **c**, qPCR analyses demonstrating that the relative expression of zygotic activation genes in the *ddx3xb* wild-type, *ddx3xb* mutant, *ddx3xb<sub>ΔN</sub>-hnRNPA1<sub>IDR</sub>* or *ddx3xb<sub>ΔN</sub>-FUS<sub>IDR</sub>* mRNA injected *ddx3xb* mutant embryos between 2 hpf and 6 hpf. Error bars, mean  $\pm$  SD,  $n = 3$  biological replicates.  $P$  values were calculated by the two-tailed Student's  $t$ -test, \*\*,  $P < 0.01$ , \*\*\*,  $P < 0.001$ .
