# Supplementary material
Source: PubMed Central journal article supplement (PMC9343644)
Supplement: 41422_2022_655_MOESM10_ESM.pdf [file 41422_2022_655_MOESM10_ESM.pdf]

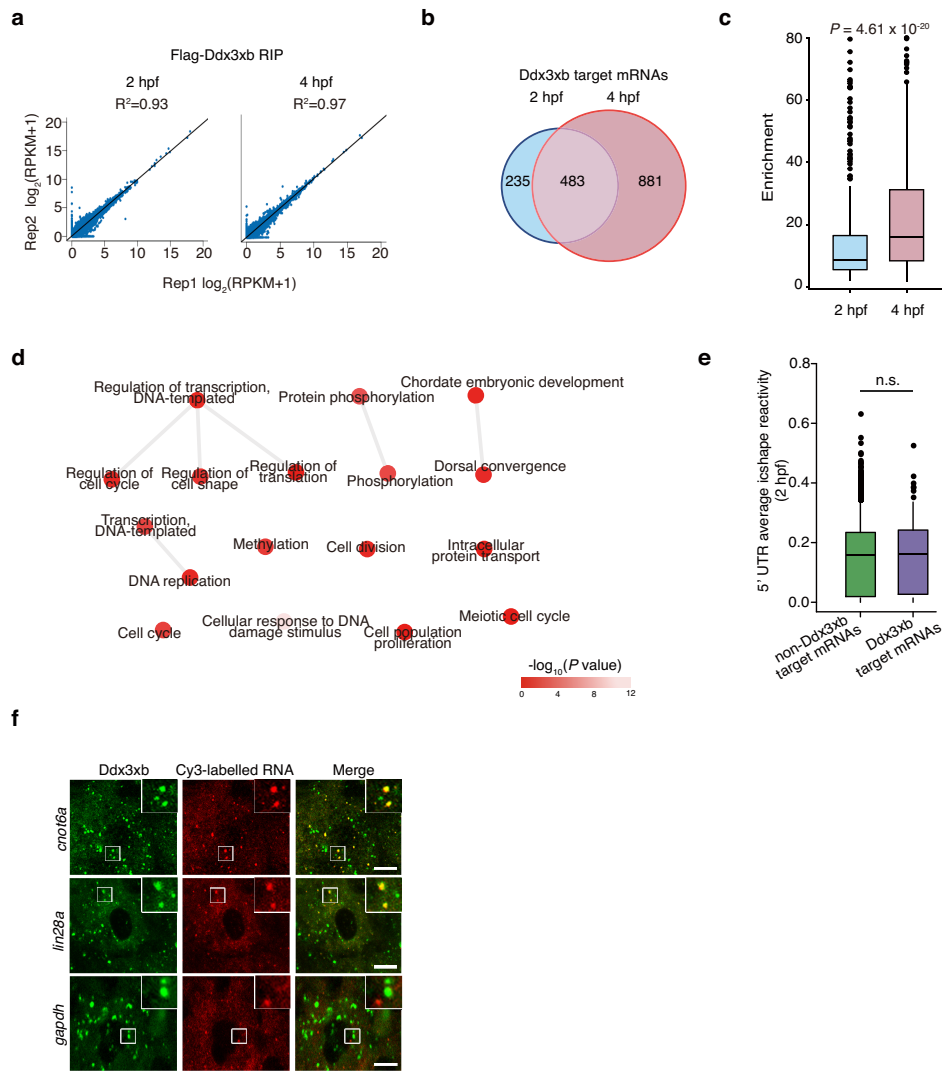

**Supplementary information, Fig. S10 Ddx3xb proteins bind maternal RNA during zebrafish early embryogenesis.** **a**, RPKM correlation of RIP-seq data between biological replicates at 2 hpf and 4 hpf. **b**, Venn diagram showing the overlap of Ddx3xb target mRNAs detected by RIP-seq using 2 hpf or 4 hpf embryos. **c**, Boxplot showing the enrichment of Ddx3xb at 5' UTR of target mRNAs at 2 hpf and 4 hpf.  $P$  values were determined by the Kruskal Wallis test. **d**, Gene ontology enrichment map of Ddx3xb target mRNAs at 4 hpf. Similar GO terms are connected by the edge of the network. The color of the ball is proportional to the  $P$  value, and the lighter the color the smaller the  $p$  value. **e**, Boxplot showing the 5' UTR average icSHAPE reactivity of non-Ddx3xb target mRNAs and Ddx3xb target mRNAs at 2 hpf.  $P$  values were

determined by the Kruskal Wallis test, n.s., not significant. **f**, Ddx3xb target maternal transcripts specifically enriched in Ddx3xb condensates.
