# Supplementary material
Source: PubMed Central journal article supplement (PMC9343644)
Supplement: 41422_2022_655_MOESM11_ESM.pdf [file 41422_2022_655_MOESM11_ESM.pdf]

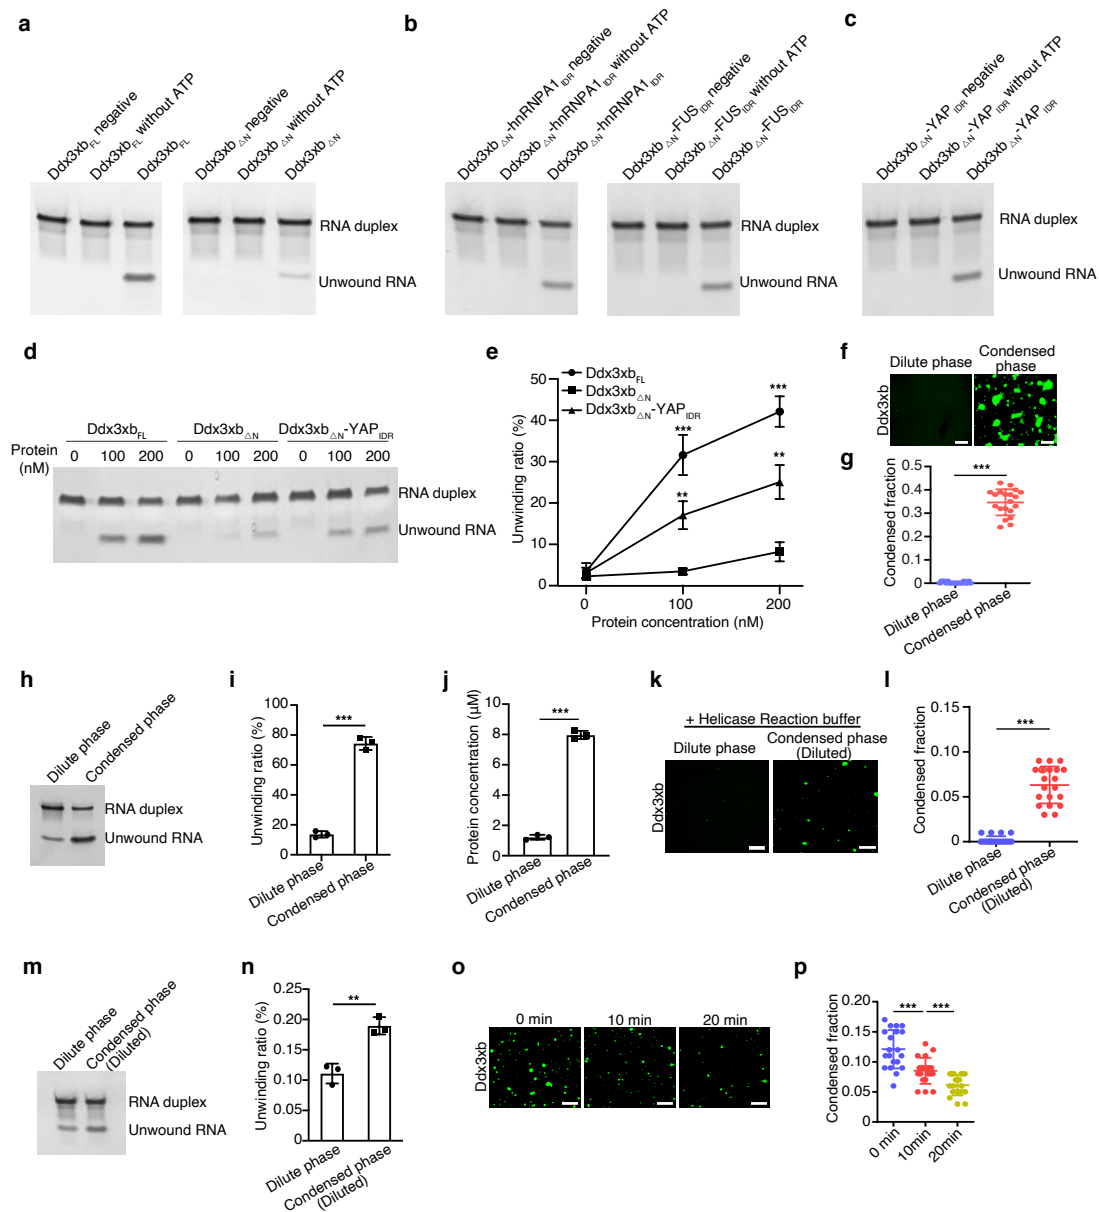

**Supplementary information, Fig. S11 Condensed Ddx3xb is the active form of helicase activity.** **a**, *In vitro* helicase assays of purified Ddx3xb<sub>FL</sub> (100 nM) and Ddx3xb<sub>ΔN</sub> (100 nM) proteins. **b**, *In vitro* helicase assays of purified Ddx3xb<sub>ΔN</sub>-hnRNPA1<sub>IDR</sub> (100 nM), and Ddx3xb<sub>ΔN</sub>-FUS<sub>IDR</sub> (100 nM) proteins. **c**, *In vitro* helicase assays of purified Ddx3xb<sub>ΔN</sub>-YAP<sub>IDR</sub> (100 nM) proteins. **d,e**, *In vitro* helicase assays using different doses (0 nM, 100 nM, and 200 nM) of purified Ddx3xb<sub>FL</sub>, Ddx3xb<sub>ΔN</sub> and Ddx3xb<sub>ΔN</sub>-YAP<sub>IDR</sub> proteins. The unwinding ratio was calculated by (unwound RNA) / ((unwound RNA) + (RNA duplex)), Error bars, mean ± SD (n = 3). *P* values

were determined by the two-tailed Student's *t* test, \*\*,  $P < 0.01$ ; \*\*\*,  $P < 0.001$ . **f**, The condensation state of the condensed phase and the dilute phase of Alexa-488 labeled Ddx3xb. Scale bars, 10  $\mu\text{m}$ . **g**, Quantification of condensed fraction of the condensed phase and the dilute phase as observed in experiments shown in (f).  $n = 20$  fields per condition. Error bars, mean  $\pm$  SD,  $P$  values were determined by the two-tailed Student's *t* test, \*\*\*,  $P < 0.001$ . **h,i**, In vitro helicase assays using the same volume of condensed phase and dilute phase. These different phases were separated from purified Ddx3xb proteins (2  $\mu\text{M}$ ) by sedimentation assay. The unwinding ratio was calculated by  $(\text{unwound RNA}) / ((\text{unwound RNA}) + (\text{RNA duplex}))$ , Error bars, mean  $\pm$  SD ( $n = 3$ ).  $P$  values were determined by the two-tailed Student's *t* test, \*\*\*,  $P < 0.001$ . **j**, The protein concentration of condensed phase and dilute phase.  $n = 3$ . Error bars, mean  $\pm$  SD,  $P$  value was determined by the two-tailed Student's *t* test, \*\*\*,  $P < 0.001$ . **k**, The condensation state of the condensed phase (diluted) group and dilute phase group was examined by using Alexa-488 labeled Ddx3xb after 20 min of reaction. Scale bars, 10  $\mu\text{m}$ . **l**, Quantification of condensed fraction of the condensed phase (diluted) group and the dilute phase group as observed in experiments shown in (k).  $n = 20$  fields per condition. Error bars, mean  $\pm$  SD,  $P$  value was determined by the two-tailed Student's *t* test, \*\*\*,  $P < 0.001$ . **m**, The helicase activity of the condensed phase (diluted) group and dilute phase group was examined by *in vitro* helicase assays. The same protein amounts of each groups were used. **n**, The unwinding ratio was calculated by  $(\text{unwound RNA}) / ((\text{unwound RNA}) + (\text{RNA duplex}))$ , Error bars, mean  $\pm$  SD ( $n = 3$ ).  $P$  value was determined by the two-tailed Student's *t* test, \*\*,  $P < 0.01$ . **o**, A time-course assay monitoring the condensation state of condensed phase (diluted) by using Alexa-488 labeled Ddx3xb. Scale bars, 10  $\mu\text{m}$ . **p**, Quantification of condensed fraction of the condensed phase (diluted) group observed in experiments shown in (o).  $n = 20$  fields per condition. Error bars, mean  $\pm$  SD,  $P$  value was determined by the two-tailed Student's *t* test, \*\*\*,  $P < 0.001$ .
