# Supplementary material
Source: PubMed Central journal article supplement (PMC9343644)
Supplement: 41422_2022_655_MOESM13_ESM.pdf [file 41422_2022_655_MOESM13_ESM.pdf]

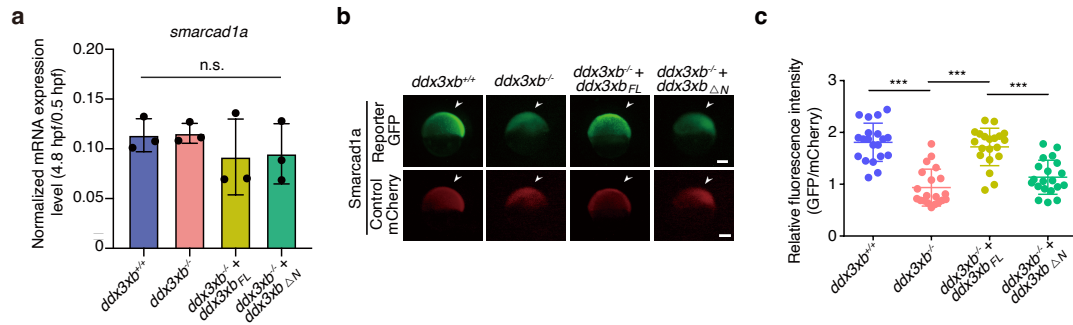

**Supplementary information, Fig. S13 Ddx3xb regulates the translation efficiency of *smarcad1a* in a condensation-dependent manner.** **a**, Relative mRNA level (4.8 hpf versus 0.5 hpf) of GFP under the control of 5'UTR of *smarcad1a* in wild-type, *ddx3xb* mutant, *ddx3xb<sub>FL</sub>* rescue or *ddx3xb<sub>ΔN</sub>* rescue embryos..  $n = 3$ , error bars, mean  $\pm$  SD,  $P$  values were determined by the two-tailed Student' s  $t$  test,  $P$ , not significant. **b,c**, Protein level of 5'UTR (*smarcad1a*)-GFP reporter at 4.8 hpf in different embryos shown by fluorescence intensities (**b**). Some pictures of representative embryos are shown. Scale bars, 100  $\mu$ m. Relative fluorescence intensity (GFP/mCherry) is shown in (**c**),  $n = 20$  for each group. Error bars, mean  $\pm$  SD,  $P$  values were determined by the two-tailed Student' s  $t$  test, \*\*\*,  $P < 0.001$ .
